# Supplementary material
Source: PubMed Central journal article supplement (PMC4259972)
Supplement: mmc1.pdf [file mmc1.pdf]

The American Journal of Human Genetics, Volume 95

Supplemental Data

## **Homozygous and Compound Heterozygous**

### **Mutations in *TGDS* Cause Catel-Manzke Syndrome**

**Nadja Ehmke, Almuth Caliebe, Rainer Koenig, Sarina G. Kant, Zornitza Stark, Valérie Cormier-Daire, Dagmar Wieczorek, Gabriele Gillessen-Kaesbach, Kirstin Hoff, Amit Kawalia, Holger Thiele, Janine Altmüller, Björn Fischer-Zirnsak, Alexej Knaus, Na Zhu, Verena Heinrich, Celine Huber, Izabela Harabula, Malte Spielmann, Denise Horn, Uwe Kornak, Jochen Hecht, Peter M. Krawitz, Peter Nürnberg, Reiner Siebert, Hermann Manzke, and Stefan Mundlos**

## Supplemental Data

**Table S1. The informative SNVs used for haplotype reconstruction.** All positions are with respect to the haploid human reference sequence GRCh37. *TGDS* is on the reverse strand thus all alternative alleles would be the complementary base in *TGDS* transcripts. The position with the pathogenic allele c.298T is coloured in red. A “0/1” represents a heterozygous genotype. A “0/0” means that the individual is homozygous for the reference allele and “1/1” means that the individual is homozygous for the alternative allele. For the haplotype reconstruction a DNA sample of individual 6 was subjected to exome sequencing following the protocol described for individual 1 and 7.

| CHR       | POS             | dbSNP              | Ref      | Alt      | MAF      | 6-II-2     | 1-II-1     | 5-I-3      | 4-II-4     | 2-II-2     | 7-II-1     |
|-----------|-----------------|--------------------|----------|----------|----------|------------|------------|------------|------------|------------|------------|
| 13        | 95228658        | .                  | T        | C        | 0        | 0/0        | 0/1        | 0/0        | 0/0        | 0/0        | 0/0        |
| 13        | 95230384        | .                  | A        | G        | 0        | 0/1        | 0/0        | 0/0        | 0/0        | 0/0        | 0/0        |
| <b>13</b> | <b>95243122</b> | <b>rs140430952</b> | <b>C</b> | <b>A</b> | <b>0</b> | <b>0/1</b> | <b>0/0</b> | <b>1/1</b> | <b>1/1</b> | <b>0/1</b> | <b>0/1</b> |
| 13        | 95243123        | rs61741685         | G        | A        | 0.012    | 0/0        | 0/1        | 0/0        | 0/0        | 0/0        | 0/0        |
| 13        | 95243126        | .                  | A        | C        | 0        | 0/0        | 0/0        | 0/0        | 0/0        | 0/1        | 0/0        |
| 13        | 95243148        | .                  | TTC      | T        | 0        | 0/0        | 0/1        | 0/0        | 0/0        | 0/0        | 0/0        |
| 13        | 95243270        | rs9301979          | G        | A        | 0.321    | 1/1        | 1/1        | 1/1        | 1/1        | 0/1        | 0/1        |
| 13        | 95248348        | rs34991132         | C        | T        | 0.006    | 0/0        | 0/1        | 0/0        | 0/0        | 0/0        | 0/0        |
| 13        | 95264604        | rs9524559          | C        | T        | 0.291    | 0/0        | 0/0        | 0/0        | 0/0        | 0/1        | 0/1        |
| 13        | 95275576        | rs4296139          | C        | G        | 0.433    | 0/1        | 1/1        | 0/0        | 0/0        | 0/1        | 0/0        |
| 13        | 95279505        | rs9524568          | T        | A        | 0.251    | 0/0        | 0/0        | 0/0        | 0/0        | 0/1        | 0/0        |

**Table S2. The most likely 6 haplotypes H.** H1 is the haplotype with the pathogenic allele c.298T.

H1: 00100010000 7.000000  
H2: 00000000100 1.000000  
H3: 00000010010 1.000000  
H4: 00001000111 1.000000  
H5: 01000010010 1.000000  
H6: 10010111010 1.000000

**Table S3. The predicted haplotypes for all affected individuals.** In agreement with the hypothesis of a founder mutation, all affected individuals with the c.298T allele share the same 50kb Haplotype H1.

1-II-1: (H3, H6)  
2-II-2: (H1, H4)  
4-II-4: (H1, H1)  
5-I-3: (H1, H1)  
6-II-2: (H1, H5)  
7-II-1: (H1, H2)
